1       **RAD sequencing and a hybrid Antarctic fur seal genome assembly**  
2       **reveal rapidly decaying linkage disequilibrium, global population**  
3       **structure and evidence for inbreeding**

4   Emily Humble<sup>\*,†</sup>, Kanchon K Dasmahapatra<sup>‡</sup>, Alvaro Martinez-Barrio<sup>§</sup>, Inês Gregório<sup>\*</sup>, Jaime  
5   Forcada<sup>†</sup>, Ann-Christin Polikeit<sup>\*</sup>, Simon D Goldsworthy<sup>\*\*</sup>, Michael E Goebel<sup>††</sup>, Joern  
6   Kalinowski<sup>‡‡</sup>, Jochen Wolf<sup>§§,\*\*\*</sup> & Joseph I Hoffman<sup>\*</sup>

7   \* Department of Animal Behaviour, University of Bielefeld, Postfach 100131, 33501 Bielefeld,  
8   Germany

9   † British Antarctic Survey, High Cross, Madingley Road, Cambridge, CB3 0ET, United Kingdom

10  ‡ Department of Biology, University of York, Heslington, York, YO10 5DD, United Kingdom

11  § Science for Life Laboratories and Department of Cell and Molecular Biology, Uppsala University,  
12  Uppsala, Sweden

13  \*\* South Australian Research and Development Institute, 2 Hamra Avenue, West Beach, South  
14  Australia, 5024, Australia

15  †† Antarctic Ecosystem Research Division, SWFSC, NMFS, NOAA, La Jolla, California 92037-1023  
16  USA

17  ‡‡ Centrum für Biotechnologie, CeBiTec, Universität Bielefeld, Universitätsstr. 27, 33615 Bielefeld,  
18  Germany

19  §§ Division of Evolutionary Biology, Faculty of Biology, Ludwig-Maximilians-Universität Munich,  
20  Planegg-Martinstried, Germany

21  \*\*\* Science for Life Laboratories and Department of Evolutionary Biology, Uppsala University,  
22  Uppsala, Sweden

23   Corresponding Author: [emily.lhumble@gmail.com](mailto:emily.lhumble@gmail.com)

24

## ABSTRACT

25 Recent advances in high throughput sequencing have transformed the study of wild organisms  
26 by facilitating the generation of high quality genome assemblies and dense genetic marker  
27 datasets. These resources have the potential to significantly advance our understanding of  
28 diverse phenomena at the level of species, populations and individuals, ranging from patterns  
29 of synteny through rates of linkage disequilibrium (LD) decay and population structure to  
30 individual inbreeding. Consequently, we used PacBio sequencing to refine an existing  
31 Antarctic fur seal (*Arctocephalus gazella*) genome assembly and genotyped 83 individuals  
32 from six populations using restriction site associated DNA (RAD) sequencing. The resulting  
33 hybrid genome comprised 6,169 scaffolds with an N50 of 6.21 Mb and provided clear evidence  
34 for the conservation of large chromosomal segments between the fur seal and dog (*Canis*  
35 *lupus familiaris*). Focusing on the most extensively sampled population of South Georgia, we  
36 found that LD decayed rapidly, reaching the background level of  $r^2 = 0.09$  by around 26 kb,  
37 consistent with other vertebrates but at odds with the notion that fur seals experienced a strong  
38 historical bottleneck. We also found evidence for population structuring, with four main  
39 Antarctic island groups being resolved. Finally, appreciable variance in individual inbreeding  
40 could be detected, reflecting the strong polygyny and site fidelity of the species. Overall, our  
41 study contributes important resources for future genomic studies of fur seals and other  
42 pinnipeds while also providing a clear example of how high throughput sequencing can  
43 generate diverse biological insights at multiple levels of organisation.

44

45

## INTRODUCTION

46 Advances in short read sequencing technologies, in particular Illumina sequencing, have  
47 made it possible to generate genome assemblies as well as dense genetic marker datasets  
48 for practically any organism (Ekblom and Galindo 2011; Ellegren 2014). However, assemblies  
49 based solely on short read data tend to be highly fragmented, even with assembly strategies  
50 that incorporate medium length insert libraries (Gnerre *et al.* 2011). Consequently, although  
51 such assemblies can be generated rapidly and cheaply, there has been growing interest in  
52 technologies that incorporate longer range information to improve scaffold length and  
53 contiguity. For example, Pacific Biosciences (PacBio) single molecule real-time (SMRT)  
54 sequencing generates read lengths in the order of several kilobases (kb) that have proven  
55 effective in gap filling, resolving complex repeats and increasing contig lengths across diverse  
56 taxa (English *et al.* 2012; Conte and Kocher 2015; Pootakham *et al.* 2017).

57 In parallel to these and related developments in genome sequencing technologies, reduced  
58 representation sequencing approaches such as restriction site associated DNA (RAD)  
59 sequencing (Baird *et al.* 2008; Peterson *et al.* 2012) are providing unprecedented levels of  
60 genetic resolution for population genetic and genomic studies (Morin *et al.* 2004; Stapley *et al.*  
61 *et al.* 2010; Seeb *et al.* 2011). By sequencing and assembling short stretches of DNA adjacent  
62 to restriction cut sites and interrogating the resulting tags for sequence polymorphisms, RAD  
63 sequencing can facilitate the acquisition of large genome-wide distributed single nucleotide  
64 polymorphism (SNP) datasets incorporating multiple individuals.

65 The above approaches show great promise for studying wild populations where genomic  
66 resources are typically absent. For example, information from model organisms with well-  
67 characterised genomes can facilitate studies of their wild relatives as long as patterns of  
68 synteny between the two can be established. Knowledge of synteny can facilitate the lifting  
69 over of gene annotations, assist in gene mapping and help to elucidate the genetic basis of  
70 fitness variation by identifying genes closely linked to loci responsible for inbreeding  
71 depression (Johnston *et al.* 2011; Ekblom and Wolf 2014; Kardos *et al.* 2016).

72 High density SNP markers mapped to a reference genome can furthermore provide insights  
73 into processes that shape levels of variation within genomes. For example, the positional  
74 information of genomic loci can be used to characterise patterns of linkage disequilibrium (LD).  
75 LD is a central concept in population genetics because it is closely associated with factors  
76 such as effective population size ( $N_e$ ), genetic drift, historical fluctuations in population size,

77 population structure, inbreeding and recombination (Slatkin 2008). Understanding the strength  
78 and extent of LD can aid in the inference of demographic history and has important  
79 implications for identifying genetic variants underlying key fitness traits through genome-wide  
80 association analyses or quantitative trait locus mapping (Carlson *et al.* 2004; Miller *et al.* 2015;  
81 Kardos *et al.* 2016). Nevertheless, the genomic pattern of LD has only been described in a  
82 handful of wild populations. Typically, LD decays within a few tens to hundreds of kilobases  
83 (kb) in large and unstructured populations (Poelstra *et al.* 2013; Kawakami *et al.* 2014; Vijay  
84 *et al.* 2016), but can extend for several megabases (Mb) in smaller, isolated, heavily  
85 bottlenecked and/or inbred populations, such as wolves and sheep (Hagenblad *et al.* 2009;  
86 Miller *et al.* 2011).

87 In addition to facilitating the characterisation of genome-wide patterns of variation, dense  
88 genomic markers can also be used to describe variation at the population and individual level,  
89 even without positional information. For example, studies are increasingly employing  
90 approaches such as RAD sequencing to obtain large datasets in order to reliably characterize  
91 genetic structure (Malenfant *et al.* 2015; Benestan *et al.* 2015; Younger *et al.* 2017) and many  
92 are uncovering patterns that had previously gone undetected (Reitzel *et al.* 2007; Ogden *et al.*  
93 *et al.* 2013; Vendrami *et al.* 2017). A precise understanding of population structure is critical for  
94 the delineation of management units for conservation (Bowen *et al.* 2005) as well as for  
95 avoiding false positives in genome-wide association studies (Johnston *et al.* 2011) but can  
96 also be used to determine contemporary and historical barriers to gene flow (McRae *et al.*  
97 2005; Hendricks *et al.* 2017) and to elucidate patterns of extinction and recolonization  
98 (McCauley 1991).

99 A major topic of interest at the level of the individual is the extent to which inbreeding occurs  
100 in natural populations (Kardos *et al.* 2016) and its consequences for fitness variation and  
101 population demography (Keller and Waller 2002). Pedigree-based studies, typically of isolated  
102 island populations and often involving polygynous species, have uncovered widespread  
103 evidence of inbreeding in the wild (Marshall *et al.* 2002; Townsend and Jamieson 2013;  
104 Nietlisbach *et al.* 2017). However, the extent of inbreeding in large, continuous and free-  
105 ranging populations remains open to question. On the one hand, simulations have suggested  
106 that inbreeding will be absent from the vast majority of wild populations with the possible  
107 exception of highly polygynous and/or structured populations (Balloux *et al.* 2004). On the  
108 other hand, associations between microsatellite heterozygosity and fitness (heterozygosity  
109 fitness correlations, HFCs) have been described in hundreds of species (Chapman *et al.* 2009)  
110 and it has been argued that these are highly unlikely to arise in the absence of inbreeding  
111 (Szulkin *et al.* 2010). Due to the high sampling variance of microsatellites, there has been

112 growing interest in the use of high density SNP data to reliably quantify inbreeding, and recent  
113 empirical and simulation studies suggest that this can be achieved with as few as 10,000  
114 SNPs (Kardos *et al.* 2015; 2018). Consequently, with approaches like RAD sequencing, it  
115 should be possible to quantify the variation in inbreeding in arguably more representative wild  
116 populations.

117 The Antarctic fur seal (*Arctocephalus gazella*) is an important marine top predator that has  
118 been extensively studied for several decades, yet many fundamental aspects of its biology  
119 remain poorly understood. This highly sexually dimorphic pinniped has a circumpolar  
120 distribution and breeds on islands across the sub-Antarctic, with 95% of the population  
121 concentrated on South Georgia in the South Atlantic (Figure 1). The species was heavily  
122 exploited by 18<sup>th</sup> and 19<sup>th</sup> Century sealers and was thought to have gone extinct at virtually all  
123 of its contemporary breeding sites (Weddell 1825). However, in the 1930s a small breeding  
124 population was found at South Georgia (Bonner 1968; Payne 1977), which in the following  
125 decades increased to number several million individuals (Boyd 1993). While it is believed that  
126 the species former range was recolonised by emigrants from this large and rapidly expanding  
127 population (Boyd 1993; Hucke-Gaete *et al.* 2004), one would expect to find little or no  
128 population structure under such a scenario. However, a global study using mitochondrial DNA  
129 resolved two main island groups (Wynen *et al.* 2000) while microsatellites uncovered  
130 significant differences between South Georgia and the nearby South Shetland Islands (Bonin  
131 *et al.* 2013), implying that at least two relict populations must have survived sealing.

132 Antarctic fur seals have been intensively studied for several decades at a small breeding  
133 colony on Bird Island, South Georgia, where a scaffold walkway provides access to the  
134 animals for the collection of detailed life history and genetic data. Genetic studies have  
135 confirmed behavioural observations of strong polygyny (Bonner 1968) by showing that a  
136 handful of top males father the majority of offspring (Hoffman *et al.* 2003). Furthermore,  
137 females exhibit strong natal site fidelity, returning to within a body length of where they were  
138 born to breed (Hoffman and Forcada 2012), while adults of both sexes are highly faithful to  
139 previously held breeding locations (Hoffman *et al.* 2006). Together these behavioural traits  
140 may increase the risk of incestuous matings. In line with this, heterozygosity measured at nine  
141 microsatellites has been found to correlate with multiple fitness traits including early survival,  
142 body size and reproductive success (Hoffman *et al.* 2004; 2010; Forcada and Hoffman 2014).  
143 However, such a small panel of microsatellites cannot provide a very precise estimate of  
144 inbreeding (Slate *et al.* 2004; Balloux *et al.* 2004) and therefore high density SNP data are  
145 required to provide more detailed insights into the variance in inbreeding in the population.

146 Here, we used PacBio sequencing to improve an existing Antarctic fur seal genome assembly  
147 comprising 8,126 scaffolds with an N50 of 3.1 Mb (Humble *et al.* 2016). We additionally RAD  
148 sequenced 83 individuals, mainly from South Georgia but also from an additional five  
149 populations, to generate a large dataset of mapped genetic markers. The resulting data were  
150 then used to investigate synteny with the dog and, within the focal South Georgia population,  
151 to characterise the pattern of LD decay as well as variance in inbreeding. Finally, using data  
152 from both RAD sequencing and 27 microsatellites, we investigated the strength and pattern  
153 of population structure across the species range and compared the ability of the two marker  
154 types to resolve genetic differences between island groups. Our hypotheses were as follows:  
155 (i) We expected to find strong synteny between the fur seal and dog (*Canis lupus familiaris*),  
156 the closest relative with an annotated, chromosome-level genome assembly; (ii) LD might be  
157 expected to decay very rapidly given that fur seals are free-ranging with large population sizes.  
158 However, the historical bottleneck could potentially have resulted in elevated levels of LD; (iii)  
159 We hypothesised that nuclear markers would detect the same two island groups as previously  
160 found with mitochondrial DNA as well as possibly resolve finer scale structuring. Furthermore,  
161 RAD sequencing should provide greater power to capture genetic differences than  
162 microsatellites; (iv) Finally, we expected to find variation in inbreeding consistent with  
163 knowledge of the species mating system as well as previous studies documenting HFCs.

164

## MATERIALS AND METHODS

### 165 **Hybrid genome assembly and PacBio DNA library preparation**

166 We first used the program GapCloser v1.12 to fill gaps in the existing fur seal genome v1.02  
167 (Humble *et al.* 2016) (NCBI SRA: BioProject PRJNA298406) based on the paired end  
168 information of the original Illumina reads. This approach closed 45,852 gaps and reduced the  
169 amount of N space in the assembly from 115,235,953 bp to 78,393,057 bp (v1.1, Table 1).  
170 Following this, we generated SMRT sequencing data from the DNA used for the original  
171 genome assembly (NCBI SRA: BioSample SAMN04159679) following the protocol described  
172 in Pendleton *et al.* (2015). First, 10 µg of pure genomic DNA was fragmented to 20 kb using  
173 the Hydroshear DNA shearing device (Digilab, Marlborough, MA) and size-selected to 9–50  
174 kb using a Blue Pippin according to the standard Pacific Biosciences SMRT bell construction  
175 protocol. The library was then sequenced on 64 PacBio RSII SMRT cells using the P6–C4  
176 chemistry. This yielded a total of 58 Gb (~19x) of sequencing data contained within 8,101,335  
177 subread bases with a mean read length of 7,177 bp (median = 6,705 bp; range = 50–54,622  
178 bp). The data have been deposited to the NCBI SRA under accession number XXXX.

179 Next, we used PBJelly v15.8.24 and blasr (<https://github.com/PacificBiosciences/blasr>) with  
180 default parameters to align the PacBio sequencing reads to the gap-closed assembly to  
181 generate a hybrid genome (v1.2). Lastly, we followed a two-step strategy to remove any indels  
182 introduced by single molecule real-time sequencing (Ross *et al.* 2013). We first used Quiver  
183 (contained in the SMRT/2.3.0 suite: GenomicConsensus v0.9.2) with the  
184 refineDinucleotideRepeats option to perform initial assembly error correction. Due to this step  
185 being computationally demanding, we ran it separately for each scaffold. Next, we mapped  
186 the original Illumina reads (Humble *et al.* 2016) to the quiver assembly (v1.3) using BWA MEM  
187 v0.7.15 (Li 2013) and used Picard tools to sort and mark duplicates. We then used Pilon  
188 v1.22 (Walker *et al.* 2014) to perform the final error correction step to generate assembly v1.4.  
189 The final assembly is available at NCBI under accession number XXXX.

### 190 **Genome alignment**

191 We aligned the fur seal scaffolds from assembly v1.4 to the dog genome (*Canis lupus*  
192 *familiaris* assembly version CanFam3.1, GenBank accession number GCA\_000002285.2)  
193 using LAST v746 (Kielbasa *et al.* 2011). First, the dog genome was prepared for alignment  
194 using the command lastdb. We then used lastal and last-split in combination with parallel-fastq  
195 to align the fur seal scaffolds against the dog genome. Using the program MafFilter, we then  
196 processed the resulting multiple alignment format (maf) file and estimated pairwise sequence  
197 divergence between the two species (Dutheil *et al.* 2014). Finally, we extracted alignment

198 coordinates from the maf file using bash commands to allow subsequent visualisation with the  
199 R package RCircos (Zhang *et al.* 2013).

### 200 **Sampling and DNA extraction**

201 Tissue samples were collected from 57 Antarctic fur seal individuals from Bird Island, South  
202 Georgia. These comprised 24 partially overlapping triads consisting of 24 pups, 16 mothers  
203 and 17 fathers. Additional samples were obtained from the main breeding colonies across the  
204 species range (Figure 1): Cape Shirreff in the South Shetlands ( $n = 6$ ), Bouvetøya ( $n = 5$ ), Îles  
205 Kerguelen ( $n = 5$ ), Heard Island ( $n = 5$ ) and Macquarie Island ( $n = 5$ ). Skin samples were  
206 collected from the inter-digital margin of the fore-flipper using piglet ear notching pliers and  
207 stored in 20% dimethyl sulphoxide saturated with NaCl at  $-20^{\circ}\text{C}$ . Skin samples from the South  
208 Shetlands were collected using a sterile 2mm biopsy punch and stored in 95% ethanol. Total  
209 genomic DNA was extracted using a standard phenol-chloroform protocol (Sambrook *et al.*  
210 1989).

### 211 **Microsatellite genotyping**

212 All samples were genotyped at 27 polymorphic microsatellite loci (see Supplementary table  
213 1), previously been found to be in Hardy-Weinberg equilibrium (HWE) in the study population  
214 at South Georgia and are unlinked (Stoffel *et al.* 2015; Peters *et al.* 2016). The loci were PCR  
215 amplified in three separate multiplexed reactions (see Supplementary Table 1) using a Type  
216 It Kit (Qiagen). The following PCR profile was used for all multiplex reactions except for  
217 multiplex one: initial denaturation of 5 min at  $94^{\circ}\text{C}$ ; 28 cycles of 30 sec at  $94^{\circ}\text{C}$ , 90 sec at  
218  $60^{\circ}\text{C}$ , and 30 sec at  $72^{\circ}\text{C}$ , followed by a final extension of 30 min at  $60^{\circ}\text{C}$ . The PCR profile of  
219 multiplex one only differed from this protocol in the annealing temperature used, which was  
220  $53^{\circ}\text{C}$ . Fluorescently labelled PCR products were then resolved by electrophoresis on an ABI  
221 3730xl capillary sequencer and allele sizes were scored using GeneMarker v1.95. To ensure  
222 high genotype quality, all traces were manually inspected and any incorrect calls were  
223 adjusted accordingly.



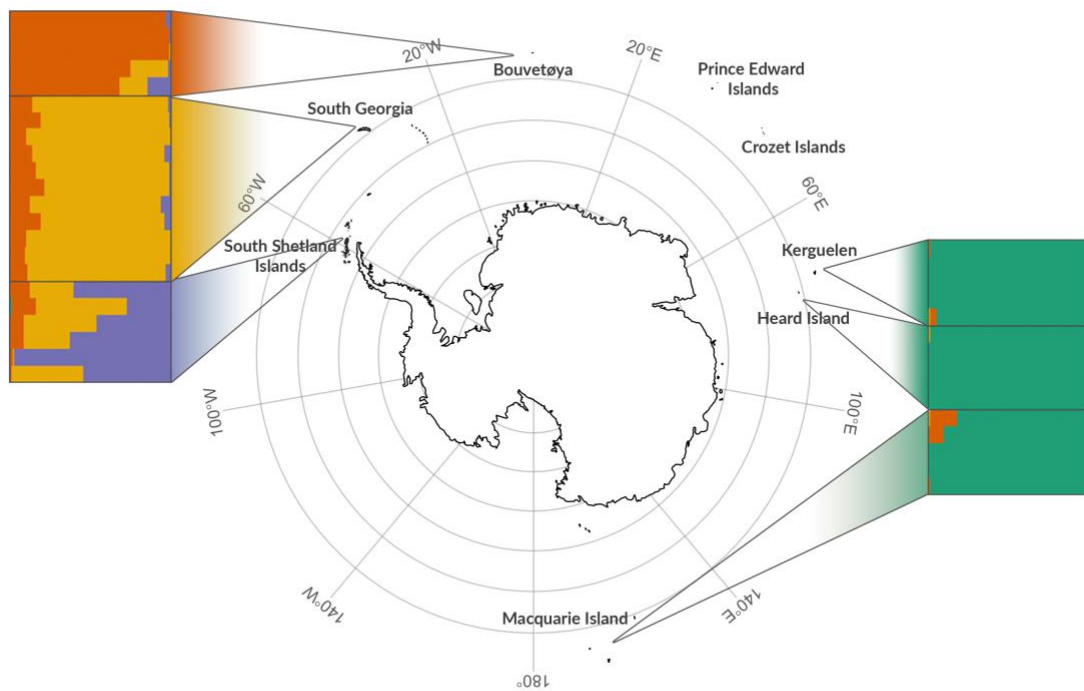

**Figure 1.** Individual assignment to genetic clusters based on STRUCTURE analysis for  $K = 4$  using 28,092 SNPs. Each horizontal bar represents a different individual and the relative proportions of the different colours indicate the probabilities of belonging to each group. Individuals are separated by sampling locations as indicated on the map.

## 224 **RAD library preparation and sequencing**

225 RAD libraries were prepared using a modified protocol from Etter *et al.* (2011) with minor  
226 modifications as described in Hoffman *et al.* (2014). Briefly, 400 ng of genomic DNA from each  
227 individual was separately digested with *SbfI* followed by the ligation of P1 adaptors with a  
228 unique 6 bp barcode for each individual in a RAD library, allowing the pooling of 16 individuals  
229 per library. Libraries were sheared with a Covaris S220 and agarose gel size-selected to 300–  
230 700 bp. Following 15–17 cycles of PCR amplification, libraries were further pooled using eight  
231 different i5 indices prior to 250 bp paired-end sequencing on two lanes of Illumina HiSeq 1500.  
232 The sequences have been deposited in the Short Read Archive (accession no. XXX).

### 233 **SNP genotyping**

234 Read quality was assessed using FastQC v0.112 and sequences trimmed to 225 bp and  
235 demultiplexed using process\_radtags in STACKS v1.41 (Catchen *et al.* 2013). We then  
236 followed GATK's best practices workflow for variant discovery (Poplin *et al.* 2017). Briefly,  
237 individual reads were mapped to the Antarctic fur seal reference genome v1.4 using BWA  
238 MEM v0.7.10 (Li 2013) with the default parameters. Any unmapped reads were removed from  
239 the SAM alignment files using SAMtools v1.1 (Li 2011). We then used Picard Tools to sort  
240 each SAM file, add read groups and remove PCR duplicates. Prior to SNP calling, we  
241 performed indel realignment to minimize the number of mismatching bases using the  
242 RealignerTargetCreator and IndelRealigner functions in GATK v3.6. Finally, HaplotypeCaller  
243 was used to call variants separately for each individual. Genomic VCF files were then passed  
244 to GenotypeGVCFs for joint genotyping. The resulting SNP dataset was then filtered to include  
245 only biallelic SNPs using BCFtools v1.2 (Li 2011) to obtain a dataset of 677,607 SNPs  
246 genotyped in 83 individuals. Subsequently, we applied a variety of filtering steps according to  
247 the analysis being performed as shown in figure S1 and described below.

### 248 **SNP validation**

249 To provide an indication of the quality of our SNP dataset, we attempted to validate a  
250 representative subset of loci using Sanger sequencing. First, we randomly selected 50 loci  
251 whose 70 bp flanking sequence contained no secondary SNPs and mapped uniquely to the  
252 fur seal reference genome and with initial depth of coverage and minor allele frequency (MAF)  
253 filters of 5 and 0.05 respectively. We then designed oligonucleotide primers using Primer 3  
254 (Untergasser *et al.* 2012) to PCR amplify each putative SNP together with 100–200 bp of  
255 flanking sequence. Each locus was PCR amplified in one fur seal individual that had been  
256 genotyped as homozygous at that locus and one that had been genotyped as heterozygous.  
257 PCRs was carried out using 1.5  $\mu$ L of template DNA, 20 mM Tris–HCl (pH 8.3), 100 mM KCl,  
258 2 mM MgCl<sub>2</sub>, 10x Reactionbuffer Y (Peqlab), 0.25 mM dNTPs, 0.25 mol/L of each primer, and  
259 0.5U of Taq DNA polymerase (VWR). The following PCR profile was used: one cycle of 1.5  
260 min at between 59° and 62° depending on the primers used (Supplementary Table 2), 60 sec  
261 at 72°C; and one final cycle of 7 min at 72°C. 5  $\mu$ L of the resulting PCR product was then  
262 purified using shrimp alkaline phosphatase and exonuclease I (NEB) following the  
263 manufacturer's recommended protocol. All fragments were then sequenced in both directions  
264 using the Applied Biosystems BigDye Terminator v3.1 Cycle Sequencing Kit (Thermo Fisher  
265 Scientific) and analyzed on an ABI 3730xl capillary sequencer. Forward and reverse reads  
266 were aligned using Geneious v10.2.3 (Kearse *et al.* 2012). Heterozygous sites were identified  
267 as those with two peaks of roughly equal intensity but with around half the intensity of a  
268 homozygote.

## 269 **Linkage disequilibrium decay**

270 Prior to quantifying linkage disequilibrium, we filtered the SNP dataset as shown in Figure  
271 S1A. First, to minimise the occurrence of unreliable genotypes, we removed individual  
272 genotypes with a depth of coverage below eight or above 30 using VCFtools (Danecek *et al.*  
273 2011). Genotypes with very low depth of coverage have a greater likelihood of being called  
274 incorrectly as it can be difficult to distinguish between homozygotes and heterozygotes when  
275 very few reads are present. Similarly, genotypes with very high depth of coverage are more  
276 likely to be spurious as high coverage can result from misalignment due to the presence of  
277 paralogous loci or repeats (Fountain *et al.* 2016). Second, as including SNPs from short  
278 scaffolds can downwardly bias LD values, we retained only SNPs located on the longest 100  
279 scaffolds of the assembly (min length = 6.6 Mb, max length = 33.1 Mb). Third, as an additional  
280 quality filtering step, we used information on known parental relationships to identify loci with  
281 Mendelian incompatibilities using the mendel function in PLINK v1.9 and removed these from  
282 the dataset. Fourth, to remove any possible confounding effects of population structure, we  
283 focussed on the single largest population of South Georgia. Fifth, to provide an informative  
284 dataset while further minimising genotyping error, we discarded SNPs with a MAF of less than  
285 0.1 and/or called in less than 50% of individuals using PLINK. As a final quality control step,  
286 we also removed SNPs that did not conform to Hardy-Weinberg equilibrium (HWE) with a  $p$ -  
287 value threshold  $< 0.001$  using the `--hwe` function in PLINK.

288 Using the final dataset of 27,347 SNPs genotyped in 57 individuals (Figure S1A), we used the  
289 `--r2` function in PLINK to quantify pairwise LD between all pairs of SNPs located within 500 kb  
290 of each other. We visualised LD decay with distance by fitting a nonlinear regression curve  
291 using the `nls` package in R, where the expected value of  $r^2$  under drift-recombination  
292 equilibrium ( $E(r^2)$ ) was expressed according to the Hill and Weir function (Hill and Weir 1988),  
293 as implemented by Marroni *et al.* (2011):

$$E(r^2) = \left[ \frac{10 + \rho}{(2 + \rho)(11 + \rho)} \right] \left[ 1 + \frac{(3 + \rho)(12 + 12\rho + \rho^2)}{n(2 + \rho)(11 + \rho)} \right]$$

294 where  $N_e$  is the effective population size,  $c$  is the recombination fraction between sites,  $\rho =$   
295  $4N_e c$  and  $n$  is the number of scaffolds (Remington *et al.* 2001).

## 296 **Population structure**

297 Prior to quantifying population structure, we filtered the full SNP dataset as shown in Figure  
298 S1B. We did not initially filter the dataset for SNPs with low depth of coverage as for the  
299 analysis of population structure we wanted to retain as many SNPs as possible that were  
300 genotyped across all the populations. We also did not remove individuals with high levels of  
301 missing data in order to maximise the representation of all populations in the final dataset.  
302 Nevertheless, because closely related individuals can bias population genetic structure  
303 analysis by introducing both Hardy-Weinberg and linkage disequilibrium (Rodriguez-Ramilo  
304 and Wang 2012; Wang 2017), we used known parentage information to remove adults and  
305 related pups (full and half siblings) from the South Georgia dataset. Second, SNPs with a MAF  
306 of less than 0.05 and/or called in less than 99% of individuals were discarded using VCFtools.  
307 Third, SNPs were pruned for LD using the --indep function in PLINK. We used a sliding window  
308 of 50 SNPs, a step size of 5 SNPs and removed all variants in a window above a variance  
309 inflation factor threshold of 2, corresponding to  $r^2 = 0.5$ . As population structure can lead to  
310 deviations from HWE, we did not filter our final dataset for HWE.

311 Using the final dataset of 28,062 SNPs genotyped in 37 individuals (Figure S1B), we first  
312 visualised population structure by performing a principal components analysis (PCA) using  
313 the R package adegenet (Jombart 2008). We then used a Bayesian clustering algorithm  
314 implemented by the program STRUCTURE to identify the number of genetic clusters ( $K$ )  
315 present in the dataset. We performed STRUCTURE runs for values of  $K$  ranging from one to  
316 six, with five simulations for each  $K$  and a burn-in of 100,000 iterations followed by 1,000,000  
317 Markov chain Monte Carlo iterations. We used the admixture and correlated allele frequency  
318 models without sampling location information. The R package pophelper (Francis 2017) was  
319 then used to analyse the STRUCTURE results, parse the output to CLUMPP for averaging  
320 across iterations and for visualising individual assignment probabilities. The optimal  $K$  was  
321 selected based on the maximum value of the mean estimated  $\ln$  probability of the data ( $\ln$   
322  $\Pr(X | K)$ ) as proposed by Pritchard *et al.* (2000) and the  $\Delta K$  method of Evanno *et al.* (2005).  
323 For comparison, we also implemented the above analyses using microsatellite data for the  
324 same individuals.

## 325 **Inbreeding coefficients**

326 Prior to quantifying inbreeding, we filtered the SNP dataset as shown in Figure S1C. First, for  
327 the analysis of inbreeding we wanted a dataset with as few gaps as possible so we discarded  
328 one individual with more than 90% missing data. Second, we removed individual genotypes  
329 with a depth of coverage below eight or above 30 using vcfutils. Third, we removed loci with  
330 Mendelian incompatibilities, and fourth, we again restricted the dataset to the focal population

331 of South Georgia. Fifth, we discarded SNPs with a MAF of less than 0.05 and/or called in less  
332 than 75% of individuals using vcftools. Finally, we filtered the SNPs for HWE as described  
333 previously and pruned linked SNPs out of the dataset using the --indep function in PLINK with  
334 the parameters shown above.

335 Using the final dataset of 9,853 SNPs genotyped in 56 individuals (Figure S1C), we calculated  
336 four genomic estimates of individual inbreeding: standardised multi-locus heterozygosity  
337 (sMLH), an estimate based on the variance of additive genotype values ( $\hat{F}_I$ ), an estimate  
338 based on excess homozygosity ( $\hat{F}_{II}$ ) and an estimate based on the correlation of uniting  
339 gametes, which gives more weight to homozygotes of the rare allele at each locus ( $\hat{F}_{III}$ ). The  
340 former was calculated using the sMLH function in the R package inbreedR (Stoffel *et al.* 2016)  
341 whilst the latter were calculated in GCTA v1.24.3 (Yang *et al.* 2011). To test for a significant  
342 correlation in heterozygosity across marker loci, we quantified identity disequilibrium (ID) using  
343 the measure  $g_2$  in the R package inbreedR (Stoffel *et al.* 2016) where significant  $g_2$  values  
344 provide support for variance in inbreeding in the population. Finally, we compared the resulting  
345  $g_2$  value with the variance in our inbreeding coefficients to determine the expected correlation  
346 between estimated ( $\hat{f}$ ) and realized ( $f^*$ ) level of inbreeding (Szulkin *et al.* 2010) given as:

$$r^2(\hat{f}, f^*) = \frac{g_2}{\sigma^2(\hat{f})}$$

347

## RESULTS

### 348 **Hybrid genome assembly**

349 We used PacBio sequencing to improve an existing Antarctic fur seal genome assembly.  
350 Using PBJelly, we were able to close a total of 45,394 gaps, resulting in a 40% reduction in  
351 overall gap space (assembly v1.2, Table 1). Subsequent assembly correction with Quiver  
352 resulted in a total of 11,319,546 modifications to the PBJelly assembly consisting of 291,179  
353 insertions, 1,117,226 substitutions and 9,911,141 deletions. Finally, PILON corrected 653,246  
354 homozygous insertions (885,794 bp), 87,818 deletions (127,024 bp) and 34,438 single-base  
355 substitutions and closed an additional 2,170 gaps in the Quiver assembly. Overall, gap closing  
356 and error correction resulted in a hybrid Antarctic fur seal assembly with a total length of 2.3  
357 Gb (v1.4, Table 1). The number of scaffolds in the genome was reduced from 8,126 to 6,169  
358 such that 50% of the final assembly is now contained within the longest 108 scaffolds (Table  
359 1).

### 360 **Genome synteny**

361 To investigate synteny between the Antarctic fur seal and the dog, we aligned the fur seal  
362 scaffolds to the dog genome (CanFam3.1). We estimated overall sequence divergence  
363 between the two species to be 13.8%. Visualisation of the full alignment revealed that all of  
364 the dog chromosomes are represented in the fur seal assembly (Figure S2). Alignment of the  
365 40 longest fur seal scaffolds (min length = 10.7 Mb, max length = 33.1 Mb) revealed strong  
366 chromosomal synteny between the two genomes, with the vast majority of the fur seal  
367 scaffolds mapping exclusively or mainly to a given dog chromosome (Figure 2). Specifically,  
368 for 37 of the scaffolds, over 90% of the total alignment length was to a single dog chromosome,  
369 with 26 of those aligning exclusively to a single dog chromosome. Only one scaffold (S4 in  
370 Figure 2) aligned in roughly equal portions to two different dog chromosomes (62% to D5 and  
371 38% to D26).

**Table 1.** Genome assembly statistics for successive improvements of the original Antarctic fur seal genome assembly.

|                       | <b>v1.0.2</b>    | <b>v1.1</b>      | <b>v1.2</b>     | <b>v1.3</b>     | <b>v1.4</b>        |
|-----------------------|------------------|------------------|-----------------|-----------------|--------------------|
|                       | <b>ALLPATHS3</b> | <b>GapCloser</b> | <b>PBJelly2</b> | <b>Quiver</b>   | <b>Pilon</b>       |
| Number of scaffolds   | 8,126            | 8,126            | 6,170           | 6,170           | 6,169 <sup>†</sup> |
| N90 <sup>a</sup>      | 890,836 (768)    | 888,912 (768)    | 1,624,547 (387) | 1,511,352 (387) | 1,542,705 (387)    |
| N50 <sup>a</sup>      | 3,169,165 (233)  | 3,165,747 (233)  | 6,454,664 (108) | 6,076,522 (108) | 6,207,322 (108)    |
| N10 <sup>a</sup>      | 8,459,351 (25)   | 8,458,289 (25)   | 17,733,103 (11) | 16,529,571 (11) | 16,861,656 (11)    |
| Longest scaffold (bp) | 13,012,173       | 12,999,316       | 34,690,325      | 32,399,786      | 33,062,611         |
| Total size (bp)       | 2,405,038,055    | 2,403,626,805    | 2,426,014,533   | 2,268,217,244   | 2,313,485,084      |
| Gaps present (%)      | 4.79             | 3.26             | 0.62            | 0.57            | 0.55               |
| Number of gaps        | 136,284          | 90,432           | 45,102          | 22,783          | 20,613             |
| Average gap size (bp) | 845.56           | 866.87           | 331.16          | 570.37          | 613.39             |

<sup>a</sup> Size in bp (number of scaffolds)

<sup>†</sup> Excluding the mitochondrial genome, which was filtered out by Pilon

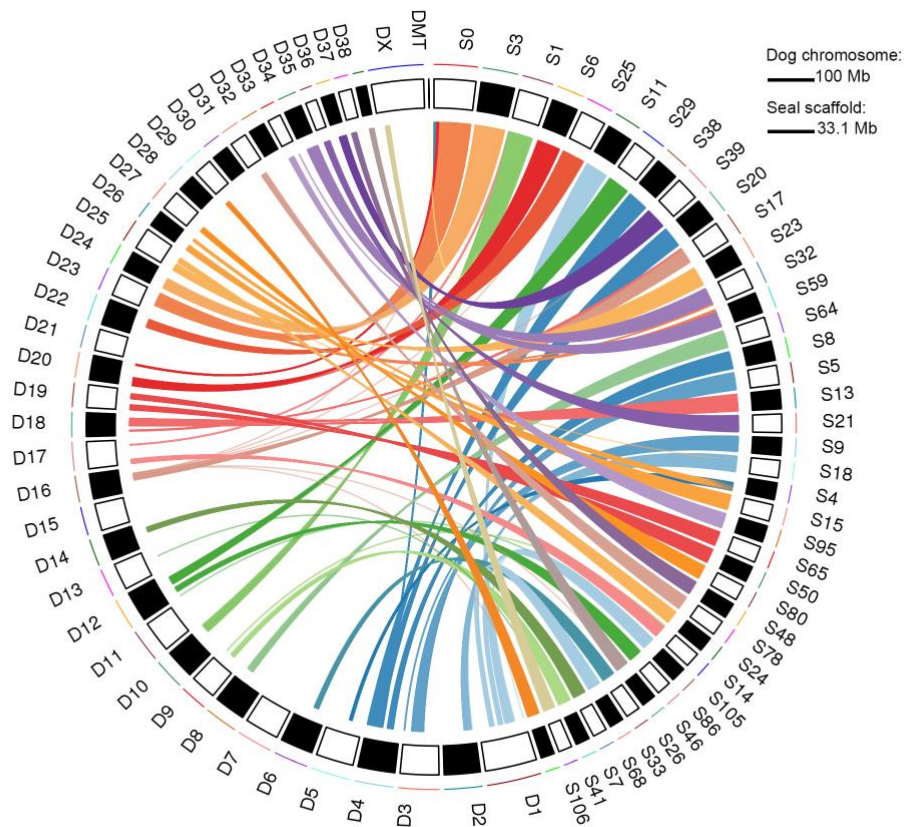

**Figure 2.** Synteny of the longest 40 Antarctic fur seal scaffolds (10.7-33.1 Mb; right, prefixed S) with dog chromosomes (left, prefixed D). Mapping each fur seal scaffold to the dog genome resulted in multiple alignment blocks (mean = 2.1 kb, range = 0.1–52.8 kb) and alignments over 5 kb are shown.

## 372 RAD sequencing and SNP discovery

373 RAD sequencing of 83 fur seal individuals generated an average of 5,689,065 250bp paired-  
374 end reads per individual. After mapping these reads to the reference genome, a total of  
375 677,607 biallelic SNPs were discovered using GATK's best practices workflow for variation  
376 discovery (see Materials and methods for details), with an average coverage of 727. We then  
377 filtered the dataset in three different ways (Supplementary Figure 1) to generate datasets  
378 suitable for the analysis of LD decay, population structure and inbreeding.

## 379 SNP validation

380 To provide an indication of the quality of our SNP dataset, we used Sanger sequencing to  
381 validate 50 randomly selected loci. For each locus, we sequenced a single heterozygote and  
382 a single homozygote individual based on the corresponding GATK genotypes. For 40 of these



383 loci, we successfully obtained genotypes for both individuals (Supplementary Table 2).  
384 Concordance between the GATK and Sanger genotypes was high, with 76 / 80 genotypes  
385 being called identically using both methods, equivalent to a validation rate of 95%. The four  
386 discordant genotypes were all initially called as homozygous with GATK but subsequently  
387 validated as heterozygous with Sanger sequencing.

### 388 **LD decay**

389 The pattern of LD decay within South Georgia was quantified based on 27,347 SNPs  
390 genotyped in 57 individuals and located on the 100 longest fur seal scaffolds. LD was found  
391 to decay rather rapidly, with  $r^2$  reaching the background level (average  $r^2 = 0.12$ ) by around  
392 18 kb and decreasing to values approaching zero by around 350 kb (Figure 3). Strong LD ( $r^2$   
393  $\geq 0.5$ ) decayed by around 5 kb and moderate LD ( $r^2 \geq 0.2$ ) by around 7 kb.

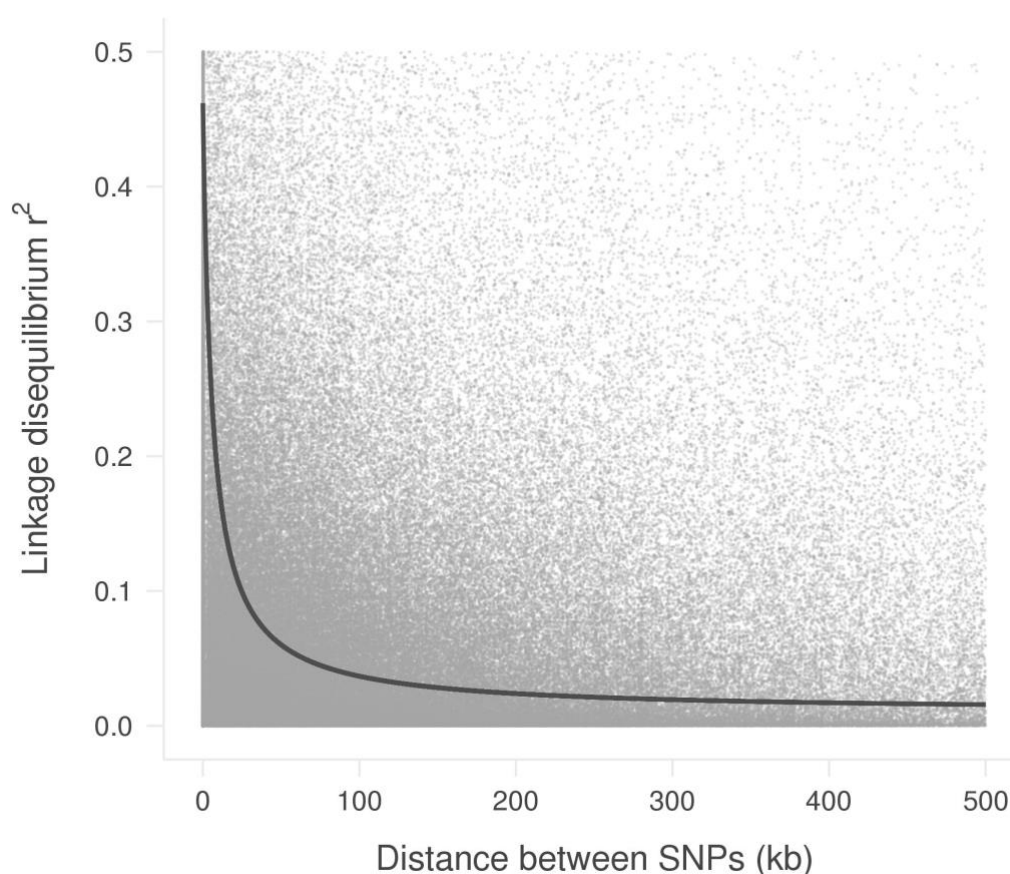

**Figure 3.** Plot of linkage disequilibrium ( $r^2$ ) against distance between SNPs in the Antarctic fur seal. LD was calculated using 27,347 filtered RAD SNPs from the 100 largest scaffolds of 57 South Georgia individuals. Grey dots indicate observed pairwise LD. Dark grey curve shows the expected decay of LD in the data estimated by nonlinear regression of  $r^2$ .

## 394 **Population structure**

395 Finally, we used a dataset of 37 pups genotyped at 27 microsatellites and 28,062 SNPs to  
396 quantify the pattern and strength of population structure across the species' circumpolar  
397 range. PCA of the microsatellite dataset uncovered weak clustering with South Georgia, the  
398 South Shetlands and Bouvetøya tending to separate apart from Kerguelen, Heard and  
399 Macquarie Islands along the first PC axis (Figure 4A). However, considerable scatter and no  
400 clear pattern of separation was found along either PC2 or PC3 (Figures 4A and 4C). By  
401 contrast, population structure was more clearly defined in the PCA of the SNP dataset.  
402 Specifically, the first PC axis clearly resolved two distinct island groups, the first comprising  
403 South Georgia, the South Shetlands and Bouvetøya and the second comprising Kerguelen,  
404 Heard Island and Macquarie Island (Figure 4B). Within the first island group, Bouvetøya  
405 clustered apart from South Georgia and the South Shetlands along PC2 (Figure 4B) while all  
406 three locations clustered apart from one another along PC3 (Figure 4D).

407

408 To test whether population structure could be detected without prior knowledge of the  
409 sampling locations of individuals, we used a Bayesian approach implemented within  
410 STRUCTURE (Pritchard *et al.* 2000). This program works by partitioning the data set in such  
411 a way that departures from Hardy-Weinberg and linkage equilibrium within the resulting  
412 groups are minimized. Separately for the microsatellite and SNP datasets, five replicate runs  
413 were conducted for each possible number of groups ( $K$ ) ranging from one, implying no  
414 population differentiation, through to six, which would imply that all of the populations are  
415 genetically distinct. For the microsatellite dataset,  $\ln \Pr(X | K)$  and  $\Delta K$  both peaked at 2,  
416 indicating support for the presence of two genetically distinct populations (Figure S3A and C).  
417 Membership coefficients for the inferred groups are summarized in Figure S4A and indicate  
418 the presence of a Western population comprising individuals from South Georgia, the South  
419 Shetlands and Bouvetøya, and an Eastern population comprising individuals from Kerguelen,  
420 Heard Island and Macquarie Island.

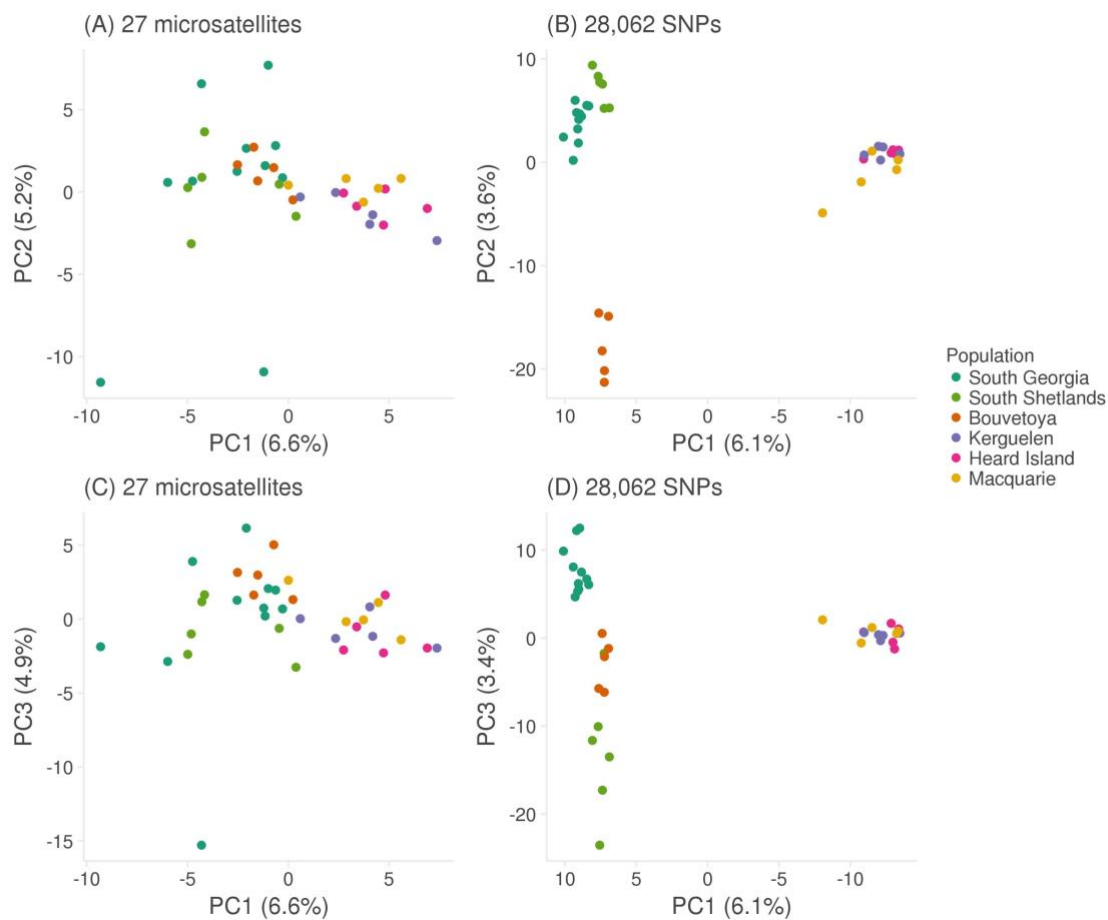

**Figure 4.** Scatterplots showing individual variation in principal components (PCs) one and two (A and B), and one and three (C and D) derived from a principal component analysis conducted using 27 microsatellites (A and C) and 28,062 SNPs (B and D). Variance explained by each PC is shown in brackets.

421 For the RAD dataset,  $\ln \Pr(X | K)$  also peaked at 2 but remained high for  $K = 3$  and 4, while  
422  $\Delta K$  reached its maximum at  $K = 4$  (Figure S3B and D). To explore this further, we plotted  
423 membership coefficients for  $K = 2$  to 6 for both the microsatellite and SNP datasets. For the  
424 former, no evidence of population structure was found beyond  $K = 2$ , with successive  
425 increases in  $K$  merely introducing additional admixture (Figure S4A). By contrast for the latter,  
426 plots corresponding to  $K$  values greater than 2 clearly resolved further hierarchical structure  
427 (Figure S4B). Results for  $K = 4$  are shown in Figure 1, in which Kerguelen, Heard and  
428 Macquarie Islands are resolved as a single population, while South Georgia, the South  
429 Shetlands and Bouvetøya can be readily distinguished based on their corresponding group  
430 membership coefficients.

## 431 Inbreeding

432 Inbreeding in the focal population at South Georgia was investigated using data from 9,853  
 433 SNPs genotyped in 56 individuals (Figure 5A). Identity disequilibrium differed significantly from  
 434 zero (0.0052; bootstrap 95% confidence interval = 0.0008–0.0091,  $p = 0.023$ , Figure 5B)  
 435 providing evidence for variance in inbreeding within the sample of individuals. Each  
 436 individual's level of inbreeding was quantified from the SNP dataset using four different  
 437 genomic inbreeding coefficients (sMLH,  $\hat{F}_I$ ,  $\hat{F}_{II}$  and  $\hat{F}_{III}$ , see Materials and methods for details).  
 438 All four of these measures were inter-correlated, with correlation coefficients ( $r$ ) ranging from  
 439 0.69 to 0.83. (Figure 5C–E). Furthermore, the variances of  $\hat{F}_I$ ,  $\hat{F}_{II}$  and  $\hat{F}_{III}$  fell within the 95%  
 440 confidence interval of  $g_2$ , suggesting that the expected correlation between the estimated and  
 441 realized level of inbreeding does not differ significantly from one (Figure 5B).

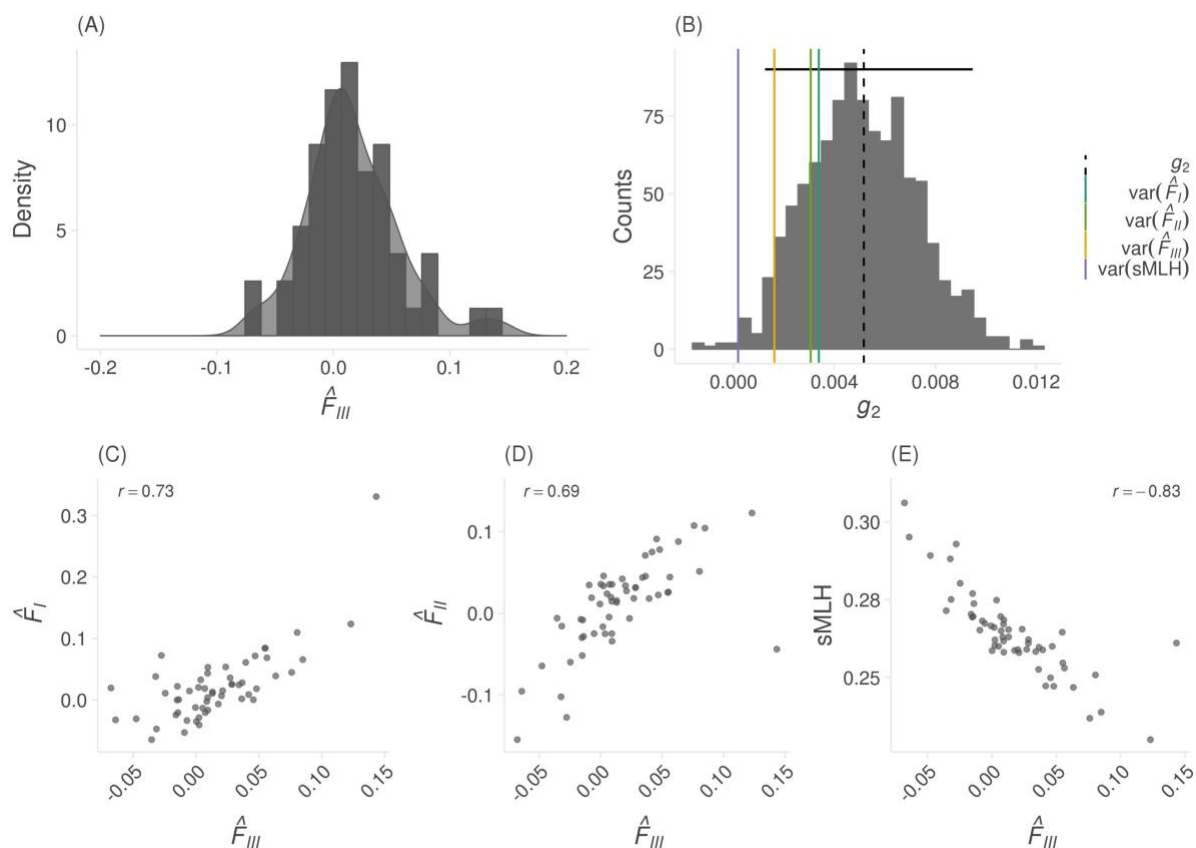

**Figure 5.** Distribution of inbreeding coefficients ( $\hat{F}_{III}$ ) for 56 South Georgia individuals (A). Distribution of identity disequilibrium ( $g_2$ ) estimates from bootstrapping over individuals (B). Horizontal black line shows 95% confidence interval from 1000 bootstrap replications. Vertical dashed line represents empirical  $g_2$  estimate. Vertical coloured lines represent variance in inbreeding coefficients. Pairwise correlation between  $\hat{F}_{III}$  and  $\hat{F}_I$ ,  $\hat{F}_{II}$ , and sMLH based on 9,853 SNPs (C, D, E). Pearson's correlation coefficients are shown.

442

## DISCUSSION

443 Advances in high throughput sequencing technology have afforded researchers the  
444 opportunity to generate genome assemblies and genomic marker datasets for virtually any  
445 species for which high quality DNA can be collected. These resources allow a broad range of  
446 questions in ecology and evolution to be addressed with greater power and precision than  
447 was possible with traditional methods. In this study, we utilised PacBio sequencing to refine  
448 an existing Antarctic fur seal genome assembly and combined this with RAD sequencing to  
449 characterize synteny with the dog genome, elucidate the rate of LD decay, resolve global  
450 population structure and quantify the variance in inbreeding. Our results provide new insights  
451 at multiple levels of organisation that enrich our understanding of an important Antarctic  
452 marine top predator and indicate the general promise of these and related approaches for  
453 tackling broad-reaching questions in population and evolutionary genetics.

### 454 **Genome alignment**

455 An important outcome of this study is a significantly improved Antarctic fur seal genome  
456 assembly. This was achieved through three iterative steps involving gap filling, inclusion of  
457 long PacBio reads and assembly error correction respectively. Overall, the number of  
458 scaffolds was reduced by around one quarter, while N50 almost doubled to over 6 Mb and the  
459 proportion of gaps was reduced by around an order of magnitude to around half a percent.  
460 This represents an improvement over existing pinniped assemblies such as the walrus  
461 (*Odobenus rosmarus divergens*, GenBank accession number GCA\_000321225.1) and  
462 Weddell seal (*Leptonychotes weddellii*, GenBank accession number GCA\_000349705.1),  
463 which both have lower N50 values (2.6 and 0.9 Mb respectively). The improved Antarctic fur  
464 seal genome will therefore serve as an important resource for the wider pinniped community.  
465 However, there is still considerable room for improvement as a handful of other marine  
466 mammal genome assemblies incorporating longer range information show higher levels of  
467 contiguity e.g. killer whale, (*Orcinus orca*, N50 = 12.7 Mb) and Hawaiian monk seal  
468 (*Neomonachus schauinslandi*, N50 = 22.2 Mb) (Foote *et al.* 2015; Mohr *et al.* 2017).

469 To further quantify genome quality and to explore patterns of synteny, we mapped the  
470 scaffolds of our new assembly to the dog genome. The resulting alignment revealed almost  
471 complete coverage of the dog chromosomes. This is in line with the observation that the total  
472 length of the assembly has not changed appreciably between versions and suggests that the  
473 assembly is near-complete, with the exception of the Y-chromosome for which sequence data  
474 are currently lacking as the genome individual is a female. In general, carnivore genomes  
475 show high levels of synteny (Arnason 1974; Ferguson-Smith and Trifonov 2007), with

476 pinnipeds in particular exhibiting highly conserved karyotypes indicative of slow rates of  
477 chromosomal evolution (Beklemisheva *et al.* 2016). By contrast, the domestic dog has an  
478 extensively re-arranged karyotype differentiated from the ancestral carnivore karyotype by  
479 over 40 separate fission events (Nie *et al.* 2011). To provide insights into the extent of  
480 conservation of chromosomal blocks between seals and dogs, we mapped the longest 40 fur  
481 seal scaffolds to the dog genome. We found a clear pattern whereby all but one of the scaffolds  
482 mapped exclusively or mainly to single chromosomes, indicating the conservation of large  
483 genomic tracts often several Mb in length. The remaining scaffold mapped to two dog  
484 chromosomes in roughly equal proportions, suggestive of either a fission event in the lineage  
485 leading to dogs or a fusion event in the lineage leading to seals. By focusing only on the largest  
486 scaffolds, we had little power to detect multiple chromosomal rearrangements, although these  
487 are to be expected given a substantial increase in the number of chromosomes in dogs ( $2n =$   
488  $74$ ) relative to the seal ( $2n = 36$ ) (Gustavsson 1964; Arnason 1974)). Nevertheless, the  
489 observed high degree of synteny is consistent with previous studies revealing both strong  
490 sequence homology and the conservation of polymorphic loci between seals and dogs  
491 (Osborne *et al.* 2011; Hoffman *et al.* 2013).

#### 492 **SNP discovery and validation**

493 Our study found a total of 667,607 SNPs in a discovery pool of 83 individuals. These markers  
494 will be useful for future studies including the planned development of a high-density SNP array.  
495 However, not all SNPs are suitable for every analysis due to differential sensitivity to missing  
496 data, low depth of sequencing coverage and the inclusion of low frequency alleles (Shafer *et*  
497 *al.* 2017). Similarly, filtering for deviations from HWE and Mendelian incompatibilities should  
498 reduce the error rate by reducing the frequency of erroneous genotypes. Yet, as population  
499 structure can generate deviations from HWE, stringent filtering may also remove genuine  
500 signal. We therefore carefully considered how best to filter our SNP dataset for each of our  
501 main analyses. For LD decay, we applied relatively strict filters as we sought a high-quality  
502 dataset with consistently high coverage across individuals. For population structure, it was  
503 important to have as many SNPs as possible represented in all of the sampling locations, so  
504 we did not remove genotypes with low coverage or containing Mendelian incompatibilities but  
505 instead filtered to retain SNPs genotyped in at least 99% of individuals. Conversely, for the  
506 estimation of inbreeding, we honed in on a reduced subset of higher quality SNPs with greater  
507 average depth of coverage, in Hardy-Weinberg and linkage equilibrium, and with no evidence  
508 of Mendelian incompatibilities.

509 Even with stringent filtering, it is possible to retain SNPs in a dataset that have been called  
510 incorrectly. We therefore attempted to validate 50 randomly selected loci by Sanger

511 sequencing selected individuals with homozygous and heterozygous genotypes as  
512 determined from the RAD data. For the 40 loci that we were able to successfully sequence,  
513 around 95% of the Sanger genotypes were identical to the RAD genotypes. Although this  
514 validation step required additional experimental effort, our results compare favourably with  
515 other studies (Cruz *et al.* 2017; Bourgeois *et al.* 2018) and thus give us confidence in the  
516 overall quality of our data.

### 517 **Linkage disequilibrium decay**

518 We used the genomic positions of SNPs mapping to the largest 100 scaffolds to quantify the  
519 pattern of LD decay in the focal population of South Georgia. We found that LD decays rapidly,  
520 with moderate LD extending less than 10 kb. This is despite the species having experienced  
521 a population bottleneck in the 19<sup>th</sup> century which is expected to increase LD. A direct  
522 comparison with other organisms is hindered both by a paucity of data for most species and  
523 by the use of different measures for quantifying LD. However, our results are broadly in line  
524 with other wild vertebrate populations such as polar bears, Alaskan gray wolves and  
525 flycatchers, where moderate LD also extends less than 10 kb (Gray *et al.* 2009; Malenfant *et*  
526 *al.* 2015; Kardos, Husby, *et al.* 2016). Extended LD has been documented in a number of  
527 species but in most cases this is associated with extreme bottlenecks, such as those  
528 experienced during domestication (Harmegnies *et al.* 2006; McKay *et al.* 2007; Meadows *et*  
529 *al.* 2008). Although Antarctic fur seals are generally believed to have also experienced a very  
530 strong historical bottleneck, a recent Bayesian analysis suggested that this may have been  
531 less severe than thought, with the effective population size probably falling to several hundred  
532 (Hoffman *et al.* 2011). Furthermore, the population recovered from the bottleneck within a few  
533 generations, which could have mitigated the increased genetic drift and inbreeding effects that  
534 elevate and maintain strong LD. Additionally, the population is currently estimated to number  
535 around 2–3 million individuals (Boyd 1993) and is one of the most genetically diverse  
536 pinnipeds (Stoffel *et al.* unpublished results). Therefore, given that LD is a function of both  
537 recombination rate and population size (Hill 1981), the rapid decay of LD in this species might  
538 also be a reflection of high long-term effective population sizes.

### 539 **Population structure**

540 To provide further insights into the recovery of Antarctic fur seals globally, we quantified  
541 population structure across the species' geographic range. Microsatellite genotypes provided  
542 evidence for two major geographic clusters, the first corresponding to South Georgia, the  
543 South Shetlands and Bøvetoya, and the second corresponding to Kerguelen, Heard and  
544 Macquarie Island. By contrast, the RAD data uncovered an additional level of hierarchical  
545 structure, resolving South Georgia, the South Shetlands and Bøvetoya as distinct

546 populations. This is consistent with simulation studies suggesting that thousands of SNPs  
547 should outperform small panels of microsatellites at resolving population structure (Haas and  
548 Payseur 2011) as well as with more recent empirical studies that have directly compared  
549 microsatellites with SNPs (Rašić *et al.* 2014; Vendrami *et al.* 2017). Furthermore, many of our  
550 populations had sample sizes of around five individuals yet could still be clearly distinguished  
551 from one another. This is in line with a recent simulation study suggesting that sample sizes  
552 as small as four individuals may be adequate for resolving population structure when the  
553 number of markers is large (Willing *et al.* 2012). Thus, our results have positive implications  
554 for studies of threatened species for which extensive sampling can be difficult but where  
555 understanding broad as well as fine-scale population structure is of critical importance.

556 It is generally believed that Antarctic fur seals were historically extirpated from virtually all of  
557 their contemporary breeding sites across the sub-Antarctic, with the possible exception of  
558 Bøvetoya, where sealing expeditions were more sporadic (Christensen 1935) and around a  
559 thousand breeding individuals were sighted just a few decades after the cessation of hunting  
560 (Olstad 1928). South Georgia was the first population to stage a major recovery, probably  
561 because a number of individuals survived at isolated locations inaccessible to sealers around  
562 the South Georgia mainland (Bonner 1968). Consequently, several authors have speculated  
563 that emigrant individuals from the expanding South Georgia population may have recolonized  
564 the species former range (Boyd 1993; Hucke-Gaete *et al.* 2004). However, Wynen *et al.* (2000)  
565 resolved two main island groups with mtDNA, while Bonin *et al.* (2014) found that significant  
566 differences between the South Shetland Islands and South Georgia with microsatellites. Our  
567 results build on these studies in two ways. First, the two major clusters we resolved using both  
568 microsatellites and RAD sequencing are identical to those identified by Wynen *et al.* (2000),  
569 suggesting that broad-scale population structure is not simply driven by female philopatry but  
570 is also present in the nuclear genome. Second, within the Western part of the species range,  
571 we not only found support for the South Shetlands being different from South Georgia, but  
572 also Bøvetoya, suggesting that relict populations probably survived at all three of these  
573 locations. By contrast, no sub-structure could be detected within the Eastern part of the  
574 species range, which taken at face value might suggest that a single population survived  
575 sealing in this region. Consistent with this, historical records suggest that fur seals went locally  
576 extinct at Heard and Macquarie islands (Page *et al.* 2003; Goldsworthy *et al.* 2009) and these  
577 populations may therefore have been recolonised by surviving populations in the Kerguelen  
578 archipelago. Thus, our study highlights the importance of relict populations to species recovery  
579 while also providing some evidence for local extinctions having occurred.



## 580 **Inbreeding**

581 Delving a level deeper, we investigated individual variation in the form of inbreeding. A recent  
582 meta-analysis has shown that small panels of microsatellites are almost always underpowered  
583 to detect variation in inbreeding (Szulkin *et al.* 2010; Miller *et al.* 2013). By contrast, a handful  
584 of recent studies have shown that tens of thousands of SNPs are capable of accurately  
585 quantifying inbreeding (Hoffman *et al.* 2014; Huisman *et al.* 2016; Berenos *et al.* 2016; Chen  
586 *et al.* 2016; Kardos *et al.* 2018). While empirical studies to date have largely focused on small,  
587 isolated populations where inbreeding may be common, it is less clear how prevalent  
588 inbreeding could be in larger, free-ranging populations. We found several lines of evidence in  
589 support of inbreeding in fur seals. First,  $g_2$  was significantly positive indicating identity  
590 disequilibrium within the sample of individuals. Second, the variance of the genomic  
591 inbreeding coefficients  $\hat{F}_I$ ,  $\hat{F}_{II}$  and  $\hat{F}_{III}$  were found to lie within the 95% confidence intervals of  
592  $g_2$  and therefore we can expect our estimates to reflect the realized level of inbreeding in the  
593 population. Third, the genomic inbreeding coefficients were strongly inter-correlated,  
594 suggesting that our markers are uncovering consistent information about variation in genome-  
595 wide homozygosity caused by inbreeding.

596 Our results are surprising given that Antarctic fur seals number in the millions and are free-  
597 ranging and highly vagile. However, the species is also highly polygynous, with a handful of  
598 top males fathering the majority of offspring (Hoffman *et al.* 2004) and females exhibiting  
599 strong natal site fidelity (Hoffman and Forcada 2012) which could potentially lead to matings  
600 between close relatives. As demographic effects can also generate variance in inbreeding  
601 *sensu lato*, we also cannot discount the possibility that the historical bottleneck contributed  
602 towards the variation we see today. To test this, we would need to quantify the length  
603 distribution of runs of homozygosity, which would require denser SNP data.

604 Our work builds upon another recent study that used RAD sequencing to quantify inbreeding  
605 in wild harbour seals (Hoffman *et al.* 2014) where a higher estimate of  $g_2$  was found, indicative  
606 of a greater variance in inbreeding within the sample. However, the study focused on stranded  
607 seals, many of which died of lungworm infection and may therefore have been enriched for  
608 unusually inbred individuals. In the current study, pups were sampled at random from within  
609 a single breeding colony, together with their parents. Consequently, our sample should be  
610 more representative of the underlying distribution of inbreeding within the population. In line  
611 with this, our estimate of  $g_2$  is more similar to those obtained in wild populations of other  
612 polygynous mammals such as Soay sheep and red deer (Huisman *et al.* 2016; Berenos *et al.*  
613 2016).

614 Our results are consistent with previous studies documenting HFCs for numerous traits in the  
615 South Georgia population (Hoffman *et al.* 2004; 2010; Forcada and Hoffman 2014) and  
616 suggest that these may well reflect inbreeding depression. More generally, literally hundreds  
617 of studies have documented HFCs across the animal kingdom (Coltman and Slate 2003) and  
618 it has been strongly argued that these HFCs are highly unlikely to occur when there is no  
619 variance in inbreeding (Szulkin *et al.* 2010). The fact that we found variation in inbreeding in  
620 a large, free-ranging population is consistent with this notion and therefore contributes towards  
621 a growing body of evidence suggesting collectively that inbreeding could be more common in  
622 wild populations than previously thought.

### 623 **Conclusion**

624 We have generated an improved genome assembly for an important Antarctic marine top  
625 predator and used RAD sequencing to provide diverse insights from the level of the species  
626 through the population to the individual. Focusing on the larger South Georgia population, we  
627 characterised rapid LD decay and uncovered significant variation in individual inbreeding,  
628 while population-level analyses resolved clear differences among island groups that  
629 emphasise the importance of relict populations to species recovery. RAD sequencing and  
630 related approaches might conceivably be applied to other wild species to characterise patterns  
631 of LD decay, elucidate fine scale population structure and uncover the broader prevalence of  
632 inbreeding and its importance to wild populations.

633

## ACKNOWLEDGEMENTS

634 We thank the British Antarctic Survey's field assistants on Bird Island for the collection of tissue  
635 samples and to David Vendrami and Martin Stoffel for useful discussions about SNP filtering.  
636 We would also like to acknowledge Anika Winkler who carried out the Illumina sequencing.  
637 Samples from Cape Shirreff, South Shetland Islands were collected under U.S. Marine  
638 Mammal Protection Act permit #16074. This work contributes to the Ecosystems project of the  
639 British Antarctic Survey, Natural Environmental Research Council, and is part of the Polar  
640 Science for Planet Earth Programme. This project was funded by a Deutsche  
641 Forschungsgemeinschaft standard grant (HO 5122/3-1) and also supported by the Swedish  
642 Research Council FORMAS (231-2012-450) as well as core funding from the Natural  
643 Environment Research Council to the British Antarctic Survey's Ecosystems Program. KKD  
644 was supported by the Natural Environment Research Council (grant NE/K012886/1) and AMB  
645 was supported by the Knut and Alice Wallenberg Foundation as part of the National  
646 Bioinformatics Infrastructure Sweden at SciLifeLab.

647

## AUTHOR CONTRIBUTIONS

648 EH and JIH conceived and designed the study. IG and JIH carried out the DNA extractions  
649 and microsatellite genotyping. KKD carried out the RAD library preparation. A-CP performed  
650 the SNP validation. JF, SG, MG, KKD, JK, JIH and JW contributed materials and funding.  
651 AMB assembled the new version of the genome with input from JW. EH carried out the SNP  
652 calling and analysed the data. EH and JIH wrote the first version of the manuscript. All of the  
653 authors commented on and approved the final manuscript.

654

## REFERENCES

655 Arnason, U., 1974 Comparative chromosome studies in Pinnipedia. *Hereditas* 76: 179–226.

656 Baird, N. A., P. D. Etter, T. S. Atwood, M. C. Currey, A. L. Shiver *et al.*, 2008 Rapid SNP  
657 discovery and genetic mapping using sequenced RAD markers. *PLoS ONE* 3: e3376.

658 Balloux, F., W. Amos, and T. Coulson, 2004 Does heterozygosity estimate inbreeding in real  
659 populations? *Molecular Ecology* 13: 3021–3031.

660 Beklemisheva, V. R., P. L. Perelman, N. A. Lemskaya, A. I. Kulemzina, A. A. Proskuryakova  
661 *et al.*, 2016 The ancestral carnivore karyotype as substantiated by comparative  
662 chromosome painting of three pinnipeds, the walrus, the steller sea lion and the baikal  
663 seal (Pinnipedia, Carnivora). *PLoS ONE* 11: e0147647.

664 Benestan, L., T. Gosselin, C. Perrier, B. Sainte-Marie, R. Rochette *et al.*, 2015 RAD  
665 genotyping reveals fine-scale genetic structuring and provides powerful population  
666 assignment in a widely distributed marine species, the American lobster (*Homarus*  
667 *americanus*). *Molecular Ecology* 24: 3299–3315.

668 Berenos, C., P. A. Ellis, J. G. Pilkington, and J. M. Pemberton, 2016 Genomic analysis  
669 reveals depression due to both individual and maternal inbreeding in a free-living  
670 mammal population. *Molecular Ecology* 25: 3152–3168.

671 Bonin, C. A., M. E. Goebel, J. Forcada, R. S. Burton, and J. I. Hoffman, 2013 Unexpected  
672 genetic differentiation between recently recolonized populations of a long-lived and  
673 highly vagile marine mammal. *Ecology and Evolution* 3: 3701–3712.

674 Bonin, C. A., M. E. Goebel, J. I. Hoffman, and R. S. Burton, 2014 High male reproductive  
675 success in a low-density Antarctic fur seal (*Arctocephalus gazella*) breeding colony.  
676 *Behav Ecol Sociobiol* 68: 597–604.

677 Bonner, W. N., 1968 The Fur Seal of South Georgia. British Antarctic Survey Report 1–95.

678 Bourgeois, S., H. Senn, J. Kaden, J. B. Taggart, R. Ogden *et al.*, 2018 Single-nucleotide  
679 polymorphism discovery and panel characterization in the African forest elephant.  
680 *Ecology and Evolution* 48: 113.

681 Bowen, B. W., A. L. Bass, L. Soares, and R. J. Toonen, 2005 Conservation implications of  
682 complex population structure: lessons from the loggerhead turtle (*Caretta caretta*).  
683 *Molecular Ecology* 14: 2389–2402.

684 Boyd, I., 1993 Pup production and distribution of breeding Antarctic fur seals (*Arctocephalus*  
685 *gazella*) at South Georgia. *Antarctic Science* 5: 17–24.

686 Carlson, C. S., M. A. Eberle, M. J. Rieder, Q. Yi, L. Kruglyak *et al.*, 2004 Selecting a  
687 maximally informative set of single-nucleotide polymorphisms for association analyses  
688 using linkage disequilibrium. *The American Journal of Human Genetics* 74: 106–120.

689 Catchen, J., P. A. Hohenlohe, S. Bassham, A. Amores, and W. A. Cresko, 2013 Stacks: an  
690 analysis tool set for population genomics. *Molecular Ecology* 22: 3124–3140.

691 Chapman, J. R., S. Nakagawa, D. W. Coltman, J. Slate, and B. C. Sheldon, 2009 A  
692 quantitative review of heterozygosity-fitness correlations in animal populations.  
693 *Molecular Ecology* 18: 2746–2765.

- 694 Chen, N., E. J. Cosgrove, R. Bowman, J. W. Fitzpatrick, and A. G. Clark, 2016 Genomic  
695 Consequences of Population Decline in the Endangered Florida Scrub-Jay. *Current*  
696 *Biology* 26: 2974–2979.
- 697 Christensen, L., 1935 *Such is the Antarctic*. Hodder and Stoughton.
- 698 Coltman, D. W., and J. Slate, 2003 Microsatellite measures of inbreeding: a meta-analysis.  
699 *Evolution* 57: 971–983.
- 700 Conte, M. A., and T. D. Kocher, 2015 An improved genome reference for the African cichlid,  
701 *Metriaclicma zebra*. *BMC Genomics* 16: 724.
- 702 Cruz, V. P., M. Vera, B. G. Pardo, J. Taggart, P. Martinez *et al.*, 2017 Identification and  
703 validation of single nucleotide polymorphisms as tools to detect hybridization and  
704 population structure in freshwater stingrays. *Molecular Ecology Resources* 17: 550–556.
- 705 Danecek, P., A. Auton, G. Abecasis, C. A. Albers, E. Banks *et al.*, 2011 The variant call  
706 format and VCFtools. *Bioinformatics* 27: 2156–2158.
- 707 Duthel, J. Y., S. Gaillard, and E. H. Stukenbrock, 2014 MafFilter: a highly flexible and  
708 extensible multiple genome alignment files processor. *BMC Genomics* 15: 53.
- 709 Ekblom, R., and J. Galindo, 2011 Applications of next generation sequencing in molecular  
710 ecology of non-model organisms. *Heredity* 107: 1–15.
- 711 Ekblom, R., and J. B. W. Wolf, 2014 A field guide to whole-genome sequencing, assembly  
712 and annotation. *Evolutionary Applications* 7: 1026–1042.
- 713 Ellegren, H., 2014 Genome sequencing and population genomics in non-model organisms.  
714 *Trends in Ecology & Evolution* 29: 51–63.
- 715 English, A. C., S. Richards, Y. Han, M. Wang, V. Vee *et al.*, 2012 Mind the gap: upgrading  
716 genomes with Pacific Biosciences RS long-read sequencing technology. *PLoS ONE* 7:  
717 e47768.
- 718 Etter, P. D., S. Bassham, P. A. Hohenlohe, E. A. Johnson, and W. A. Cresko, 2011 SNP  
719 discovery and genotyping for evolutionary genetics using RAD sequencing. *Methods*  
720 *Mol. Biol.* 772: 157–178.
- 721 Evanno, G., S. Regnaut, and J. Goudet, 2005 Detecting the number of clusters of individuals  
722 using the software structure: a simulation study. *Molecular Ecology* 14: 2611–2620.
- 723 Ferguson-Smith, M. A., and V. Trifonov, 2007 Mammalian karyotype evolution. *Nature*  
724 *Reviews. Genetics* 8: 950–962.
- 725 Foote, A. D., Y. Liu, G. W. C. Thomas, T. Vinar, J. Alföldi *et al.*, 2015 Convergent evolution  
726 of the genomes of marine mammals. *Nature Genetics* 47: 272–275.
- 727 Forcada, J., and J. I. Hoffman, 2014 Climate change selects for heterozygosity in a declining  
728 fur seal population. *Nature* 511: 462–465.
- 729 Fountain, E. D., J. N. Pauli, B. N. Reid, P. J. Palsbøll, and M. Z. Peery, 2016 Finding the  
730 right coverage: the impact of coverage and sequence quality on single nucleotide  
731 polymorphism genotyping error rates. *Molecular Ecology Resources* 16: 966–978.
- 732 Francis, R. M., 2017 pophelper: an R package and web app to analyse and

- 733 visualize population structure. *Molecular Ecology Resources* 17: 27–32.
- 734 Gnerre, S., I. MacCallum, D. Przybylski, F. J. Ribeiro, J. N. Burton *et al.*, 2011 High-quality  
735 draft assemblies of mammalian genomes from massively parallel sequence data. *PNAS*  
736 108: 1513–1518.
- 737 Goldsworthy, S. D., J. McKenzie, B. Page, M. L. Lancaster, P. D. Shaughnessy *et al.*, 2009  
738 Fur seals at Macquarie Island: post-sealing colonisation, trends in abundance and  
739 hybridisation of three species. *Polar Biol* 32: 1473–1486.
- 740 Gray, M. M., J. M. Granka, C. D. Bustamante, N. B. Sutter, A. R. Boyko *et al.*, 2009 Linkage  
741 disequilibrium and demographic history of wild and domestic canids. *Genetics* 181:  
742 1493–1505.
- 743 Gustavsson, I., 1964 The chromosomes of the dog. *Hereditas* 51: 187–189.
- 744 Haasl, R. J., and B. A. Payseur, 2011 Multi-locus inference of population structure: a  
745 comparison between single nucleotide polymorphisms and microsatellites. *Heredity* 106:  
746 158–171.
- 747 Hagenblad, J., M. Olsson, H. G. Parker, E. A. Ostrander, and H. Ellegren, 2009 Population  
748 genomics of the inbred Scandinavian wolf. *Molecular Ecology* 18: 1341–1351.
- 749 Harmegnies, N., F. Farnir, F. Davin, N. Buys, M. Georges *et al.*, 2006 Measuring the extent  
750 of linkage disequilibrium in commercial pig populations. *Animal genetics* 37: 225–231.
- 751 Hendricks, S., B. Epstein, B. Schönfeld, C. Wiench, R. Hamede *et al.*, 2017 Conservation  
752 implications of limited genetic diversity and population structure in Tasmanian devils  
753 (*Sarcophilus harrisii*). *Conservation Genetics* 18: 977–982.
- 754 Hill, W. G., 1981 Estimation of effective population size from data on linkage disequilibrium.  
755 *Genetics Research* 38: 209–216.
- 756 Hill, W. G., and B. S. Weir, 1988 Variances and covariances of squared linkage disequilibria  
757 in finite populations. *Theoretical Population Biology* 33: 54–78.
- 758 Hoffman, J. I., and J. Forcada, 2012 Extreme natal philopatry in female Antarctic fur seals  
759 (*Arctocephalus gazella*). *Mammalian Biology* 77: 71–73.
- 760 Hoffman, J. I., I. L. Boyd, and W. Amos, 2004 Exploring the relationship between parental  
761 relatedness and male reproductive success in the Antarctic fur seal *Arctocephalus*  
762 *gazella*. *Evolution* 58: 2087.
- 763 Hoffman, J. I., I. L. Boyd, and W. Amos, 2003 Male reproductive strategy and the importance  
764 of maternal status in the Antarctic fur seal *Arctocephalus gazella*. *Evolution* 57: 1917.
- 765 Hoffman, J. I., J. Forcada, and W. Amos, 2010 Exploring the Mechanisms Underlying a  
766 Heterozygosity-Fitness Correlation for Canine Size in the Antarctic Fur Seal  
767 *Arctocephalus gazella*. *Journal of Heredity* 101: 539–552.
- 768 Hoffman, J. I., S. M. Grant, J. Forcada, and C. D. Phillips, 2011 Bayesian inference of a  
769 historical bottleneck in a heavily exploited marine mammal. *Molecular Ecology* 20:  
770 3989–4008.
- 771 Hoffman, J. I., F. Simpson, P. David, J. M. Rijks, T. Kuiken *et al.*, 2014 High-throughput  
772 sequencing reveals inbreeding depression in a natural population. *Proceedings of the*

- 773 National Academy of Sciences of the United States of America 111: 3775–3780.
- 774 Hoffman, J. I., M. A. Thorne, R. McEwan, J. Forcada, and R. Ogden, 2013 Cross-  
775 amplification and validation of SNPs conserved over 44 million years between seals and  
776 dogs. PLoS ONE 8: e68365.
- 777 Hoffman, J. I., P. N. Trathan, and W. Amos, 2006 Genetic tagging reveals extreme site  
778 fidelity in territorial male Antarctic fur seals *Arctocephalus gazella*. Molecular Ecology  
779 15: 3841–3847.
- 780 Hucke-Gaete, R., L. P. Osman, C. A. Moreno, and D. Torres, 2004 Examining natural  
781 population growth from near extinction: the case of the Antarctic fur seal at the South  
782 Shetlands, Antarctica. Polar Biol 27: 304–311.
- 783 Huisman, J., L. E. B. Kruuk, P. A. Ellis, T. Clutton-Brock, and J. M. Pemberton, 2016  
784 Inbreeding depression across the lifespan in a wild mammal population. Proceedings of  
785 the National Academy of Sciences of the United States of America 201518046–6.
- 786 Humble, E., A. Martinez-Barrio, J. Forcada, P. N. Trathan, M. A. S. Thorne *et al.*, 2016 A  
787 draft fur seal genome provides insights into factors affecting SNP validation and how to  
788 mitigate them. Molecular Ecology Resources 16: 909–921.
- 789 Johnston, S. E., J. C. McEwan, N. K. Pickering, J. W. Kijas, D. Beraldi *et al.*, 2011 Genome-  
790 wide association mapping identifies the genetic basis of discrete and quantitative  
791 variation in sexual weaponry in a wild sheep population. Molecular Ecology 2555–2566.
- 792 Jombart, T., 2008 adegenet: a R package for the multivariate analysis of genetic markers.  
793 Bioinformatics 24: 1403–1405.
- 794 Kardos, M., M. Åkesson, T. Fountain, Ø. Flagstad, O. Liberg *et al.*, 2018 Genomic  
795 consequences of intensive inbreeding in an isolated wolf population. Nat Ecol Evol 2:  
796 124–131.
- 797 Kardos, M., A. Husby, S. E. McFarlane, A. Qvarnström, and H. Ellegren, 2016 Whole-  
798 genome resequencing of extreme phenotypes in collared flycatchers highlights the  
799 difficulty of detecting quantitative trait loci in natural populations. Molecular Ecology  
800 Resources 16: 727–741.
- 801 Kardos, M., G. Luikart, and F. W. Allendorf, 2015 Measuring individual inbreeding in the age  
802 of genomics: marker-based measures are better than pedigrees. Heredity 115: 63–72.
- 803 Kardos, M., H. R. Taylor, H. Ellegren, G. Luikart, and F. W. Allendorf, 2016 Genomics  
804 advances the study of inbreeding depression in the wild. Evolutionary Applications 9:  
805 1205–1218.
- 806 Kawakami, T., N. Backström, R. Burri, A. Husby, P. Olason *et al.*, 2014 Estimation of linkage  
807 disequilibrium and interspecific gene flow in Ficedulaflycatchers by a newly developed  
808 50k single-nucleotide polymorphism array. Molecular Ecology Resources 14: 1248–  
809 1260.
- 810 Kearse, M., R. Moir, A. Wilson, S. Stones-Havas, M. Cheung *et al.*, 2012 Geneious Basic:  
811 An integrated and extendable desktop software platform for the organization and  
812 analysis of sequence data. Bioinformatics 28: 1647–1649.
- 813 Keller, L. F., and D. M. Waller, 2002 Inbreeding effects in wild populations. Trends in

- 814 Ecology & Evolution 17: 230–241.
- 815 Kielbasa, S. M., R. Wan, K. Sato, P. Horton, and M. C. Frith, 2011 Adaptive seeds tame  
816 genomic sequence comparison. *Genome Research* 21: 487–493.
- 817 Li, H., 2011 A statistical framework for SNP calling, mutation discovery, association mapping  
818 and population genetical parameter estimation from sequencing data. *Bioinformatics* 27:  
819 2987–2993.
- 820 Li, H., 2013 Aligning sequence reads, clone sequences and assembly contigs with BWA-  
821 MEM. arXiv.
- 822 Malenfant, R. M., D. W. Coltman, and C. S. Davis, 2015 Design of a 9K illumina BeadChip  
823 for polar bears (*Ursus maritimus*) from RAD and transcriptome sequencing. *Molecular*  
824 *Ecology Resources* 15: 587–600.
- 825 Marroni, F., S. Pinosio, G. Zaina, F. Fogolari, N. Felice *et al.*, 2011 Nucleotide diversity and  
826 linkage disequilibrium in *Populus nigra* cinnamyl alcohol dehydrogenase (*CAD4*) gene.  
827 *Tree Genetics & Genomes* 7: 1011–1023.
- 828 Marshall, T. C., D. W. Coltman, J. M. Pemberton, J. Slate, J. A. Spalton *et al.*, 2002  
829 Estimating the prevalence of inbreeding from incomplete pedigrees. *Proc. Biol. Sci.* 269:  
830 1533–1539.
- 831 McCauley, D. E., 1991 Genetic consequences of local population extinction and  
832 recolonization. *Trends in Ecology & Evolution* 6: 5–8.
- 833 McKay, S. D., R. D. Schnabel, B. M. Murdoch, L. K. Matukumalli, J. Aerts *et al.*, 2007 Whole  
834 genome linkage disequilibrium maps in cattle. *BMC Genet.* 8: 74.
- 835 McRae, B. H., P. Beier, L. E. Dewald, L. Y. Huynh, and P. Keim, 2005 Habitat barriers limit  
836 gene flow and illuminate historical events in a wide-ranging carnivore, the American  
837 puma. *Molecular Ecology* 14: 1965–1977.
- 838 Meadows, J. R. S., E. K. F. Chan, and J. W. Kijas, 2008 Linkage disequilibrium compared  
839 between five populations of domestic sheep. *BMC Genet.* 9: 61.
- 840 Miller, J. M., R. M. Malenfant, P. David, C. S. Davis, J. Poissant *et al.*, 2013 Estimating  
841 genome-wide heterozygosity: effects of demographic history and marker type. 112: 240–  
842 247.
- 843 Miller, J. M., J. Poissant, J. W. Kijas, D. W. Coltman, International Sheep Genomics  
844 Consortium, 2011 A genome-wide set of SNPs detects population substructure and long  
845 range linkage disequilibrium in wild sheep. *Molecular Ecology Resources* 11: 314–322.
- 846 Miller, J. M., J. Poissant, R. M. Malenfant, J. T. Hogg, and D. W. Coltman, 2015 Temporal  
847 dynamics of linkage disequilibrium in two populations of bighorn sheep. *Ecology and*  
848 *Evolution* 5: 3401–3412.
- 849 Mohr, D. W., A. Naguib, N. Weisenfeld, V. Kumar, P. Shah *et al.*, 2017 Improved de novo  
850 Genome Assembly: Synthetic long read sequencing combined with optical mapping  
851 produce a high quality mammalian genome at relatively low cost. bioRxiv.
- 852 Morin, P. A., G. Luikart, R. K. Wayne, and the SNP workshop group, 2004 SNPs in ecology,  
853 evolution and conservation. *Trends in Ecology & Evolution* 19: 208–216.



- 854 Nie, W., J. Wang, W. Su, D. Wang, A. Tanomtong *et al.*, 2011 Chromosomal  
855 rearrangements and karyotype evolution in carnivores revealed by chromosome  
856 painting. *Heredity* 108: 17–27.
- 857 Nietlisbach, P., L. F. Keller, G. Camenisch, F. Guillaume, P. Arcese *et al.*, 2017 Pedigree-  
858 based inbreeding coefficient explains more variation in fitness than heterozygosity at  
859 160 microsatellites in a wild bird population. *Proceedings. Biological sciences / The*  
860 *Royal Society* 284: 20162763.
- 861 Ogden, R., K. Gharbi, N. Mugue, J. Martinsohn, H. Senn *et al.*, 2013 Sturgeon conservation  
862 genomics: SNP discovery and validation using RAD sequencing. *Molecular Ecology* 22:  
863 3112–3123.
- 864 Olstad, O., 1928 Trekk av Sydishavets dyreliv. *Norsk Geografisk Tidsskrift - Norwegian*  
865 *Journal of Geography* 2: 511–534.
- 866 Osborne, A. J., R. Brauning, J. K. Schultz, M. A. Kennedy, J. Slate *et al.*, 2011 Development  
867 of a predicted physical map of microsatellite locus positions for pinnipeds, with wider  
868 applicability to the Carnivora. *Molecular Ecology Resources* 11: 503–513.
- 869 Page, B., A. Welling, M. Chambellant, S. D. Goldsworthy, T. Dorr *et al.*, 2003 Population  
870 status and breeding season chronology of Heard Island fur seals. *Polar Biol* 26: 219–  
871 224.
- 872 Payne, M. R., 1977 Growth of a fur seal population. *Phil. Trans. R. Soc. Lond. B* 279: 67–79.
- 873 Pendleton, M., R. Sebra, A. W. C. Pang, A. Ummat, O. Franzen *et al.*, 2015 Assembly and  
874 diploid architecture of an individual human genome via single-molecule technologies.  
875 *Nature Publishing Group* 12: 780–786.
- 876 Peters, L., E. Humble, N. Kröcker, B. Fuchs, J. Forcada *et al.*, 2016 Born blonde: a  
877 recessive loss-of-function mutation in the melanocortin 1 receptor is associated with  
878 cream coat coloration in Antarctic fur seals. *Ecology and Evolution* 6: 5705–5717.
- 879 Peterson, B. K., J. N. Weber, E. H. Kay, H. S. Fisher, and H. E. Hoekstra, 2012 Double  
880 Digest RADseq: An inexpensive method for de novo snp discovery and genotyping in  
881 model and non-model species. *PLoS ONE* 7: e37135.
- 882 Poelstra, J. W., H. Ellegren, and J. B. W. Wolf, 2013 An extensive candidate gene approach  
883 to speciation: diversity, divergence and linkage disequilibrium in candidate pigmentation  
884 genes across the European crow hybrid zone. *Heredity* 111: 467–473.
- 885 Pootakham, W., C. Sonthirod, C. Naktang, P. Ruang-Areerate, T. Yoocha *et al.*, 2017 De  
886 novo hybrid assembly of the rubber tree genome reveals evidence of paleotetraploidy in  
887 *Hevea* species. *Scientific Reports* 7: 41457.
- 888 Poplin, R., V. Ruano-Rubio, M. A. DePristo, T. J. Fennell, M. O. Carneiro *et al.*, 2017 Scaling  
889 accurate genetic variant discovery to tens of thousands of samples. *bioRxiv* 201178.
- 890 Pritchard, J. K., M. Stephens, and P. Donnelly, 2000 Inference of Population Structure Using  
891 Multilocus Genotype Data. *Genetics* 155: 945–959.
- 892 Rašić, G., I. Filipović, A. R. Weeks, and A. A. Hoffmann, 2014 Genome-wide SNPs lead to  
893 strong signals of geographic structure and relatedness patterns in the major arbovirus  
894 vector, *Aedes aegypti*. *BMC Genomics* 15: 275.

- 895 Reitzel, A. M., J. A. Darling, J. C. Sullivan, and J. R. Finnerty, 2007 Global population  
896 genetic structure of the starlet anemone *Nematostella vectensis*: multiple introductions  
897 and implications for conservation policy. *Biological Invasions* 10: 1197–1213.
- 898 Remington, D. L., J. M. Thornsberry, Y. Matsuoka, L. M. Wilson, S. R. Whitt *et al.*, 2001  
899 Structure of linkage disequilibrium and phenotypic associations in the maize genome.  
900 *Proceedings of the National Academy of Sciences of the United States of America* 98:  
901 11479–11484.
- 902 Rodriguez-Ramilo, S. T., and J. Wang, 2012 The effect of close relatives on unsupervised  
903 Bayesian clustering algorithms in population genetic structure analysis. *Molecular*  
904 *Ecology Resources* 12: 873–884.
- 905 Ross, M. G., C. Russ, M. Costello, A. Hollinger, N. J. Lennon *et al.*, 2013 Characterizing and  
906 measuring bias in sequence data. *Genome Biology* 14: R51.
- 907 Sambrook, J., E. F. Fritsch, and T. Maniatis, 1989 *Molecular cloning: a laboratory manual*.  
908 Cold Spring Harbour Laboratory Press, New York.
- 909 Seeb, J. E., G. R. Carvalho, L. Hauser, K. Naish, S. Roberts *et al.*, 2011 Single-nucleotide  
910 polymorphism (SNP) discovery and applications of SNP genotyping in nonmodel  
911 organisms. *Molecular Ecology Resources* 11: 1–8.
- 912 Shafer, A. B. A., C. R. Peart, S. Tusso, I. Maayan, A. Brelsford *et al.*, 2017 Bioinformatic  
913 processing of RAD-seq data dramatically impacts downstream population genetic  
914 inference (M. Gilbert, Ed.). *Methods in Ecology and Evolution* 8: 907–917.
- 915 Slate, J., P. David, K. G. Dodds, B. A. Veenvliet, B. C. Glass *et al.*, 2004 Understanding the  
916 relationship between the inbreeding coefficient and multilocus heterozygosity: theoretical  
917 expectations and empirical data. *Heredity* 93: 255–265.
- 918 Slatkin, M., 2008 Linkage disequilibrium--understanding the evolutionary past and mapping  
919 the medical future. *Nature Reviews. Genetics* 9: 477–485.
- 920 Stapley, J., J. Reger, P. G. D. Feulner, C. Smadja, J. Galindo *et al.*, 2010 Adaptation  
921 genomics: the next generation. *Trends in Ecology & Evolution* 25: 705–712.
- 922 Stoffel, M. A., B. A. Caspers, J. Forcada, A. Giannakara, M. Baier *et al.*, 2015 Chemical  
923 fingerprints encode mother-offspring similarity, colony membership, relatedness, and  
924 genetic quality in fur seals. *PNAS* 112: E5005–12.
- 925 Stoffel, M. A., M. Esser, M. Kardos, E. Humble, H. Nichols *et al.*, 2016 inbreedR: an R  
926 package for the analysis of inbreeding based on genetic markers. *Methods in Ecology*  
927 *and Evolution* 7: 1331–1339.
- 928 Szulkin, M., N. Bierne, and P. David, 2010 Heterozygosity-fitness correlations: a time for  
929 reappraisal. *Evolution* 64: 1202–1217.
- 930 Townsend, S. M., and I. G. Jamieson, 2013 Molecular and pedigree measures of  
931 relatedness provide similar estimates of inbreeding depression in a bottlenecked  
932 population. *Journal of Evolutionary Biology* 26: 889–899.
- 933 Untergasser, A., I. Cutcutache, T. Koressaar, J. Ye, B. C. Faircloth *et al.*, 2012 Primer3--new  
934 capabilities and interfaces. *Nucleic Acids Research* 40: e115.

- 935 Vendrami, D. L. J., L. Telesca, H. Weigand, M. Weiss, K. Fawcett *et al.*, 2017 RAD  
936 sequencing resolves fine-scale population structure in a benthic invertebrate:  
937 implications for understanding phenotypic plasticity. *R Soc Open Sci* 4: 160548.
- 938 Vijay, N., C. M. Bossu, J. W. Poelstra, M. H. Weissensteiner, A. Suh *et al.*, 2016 Evolution of  
939 heterogeneous genome differentiation across multiple contact zones in a crow species  
940 complex. *Nature Communications* 7: 13195.
- 941 Walker, B. J., T. Abeel, T. Shea, M. Priest, A. Abouelliel *et al.*, 2014 Pilon: an integrated tool  
942 for comprehensive microbial variant detection and genome assembly improvement.  
943 *PLoS ONE* 9: e112963.
- 944 Wang, J., 2017 The computer program structure for assigning individuals to populations:  
945 easy to use but easier to misuse. *Molecular Ecology Resources* 17: 981–990.
- 946 Weddell, J., 1825 *A voyage towards the south pole performed in the years 1822-1824*.  
947 Longman, Hurst, Rees, Orme, Brown and Green, London.
- 948 Willing, E.-M., C. Dreyer, and C. van Oosterhout, 2012 Estimates of Genetic Differentiation  
949 Measured by  $F_{ST}$  Do Not Necessarily Require Large Sample Sizes When Using Many  
950 SNP Markers. *PLoS ONE* 7: e42649.
- 951 Wynen, L. P., S. D. Goldsworthy, C. Guinet, M. N. Bester, I. L. Boyd *et al.*, 2000 Postsealing  
952 genetic variation and population structure of two species of fur seal (*Arctocephalus*  
953 *gazella* and *A. tropicalis*). *Molecular Ecology* 9: 299–314.
- 954 Yang, J., S. H. Lee, M. E. Goddard, and P. M. Visscher, 2011 GCTA: A Tool for Genome-  
955 wide Complex Trait Analysis. *The American Journal of Human Genetics* 88: 76–82.
- 956 Younger, J. L., G. V. Clucas, D. Kao, A. D. Rogers, K. Gharbi *et al.*, 2017 The challenges of  
957 detecting subtle population structure and its importance for the conservation of emperor  
958 penguins. *Molecular Ecology* 26: 3883–3897.
- 959 Zhang, H., P. Meltzer, and S. Davis, 2013 RCircos: an R package for Circos 2D track plots.  
960 *BMC Bioinformatics* 14: 244.
